# Supplementary material for: Selective Production of Phenol on Bifunctional, Hierarchical ZSM-5 Zeolites
Source: MDPI journal article supplement (doi:10.3390/molecules26123576), 2021-06-11
Supplement: s1 [file s1]

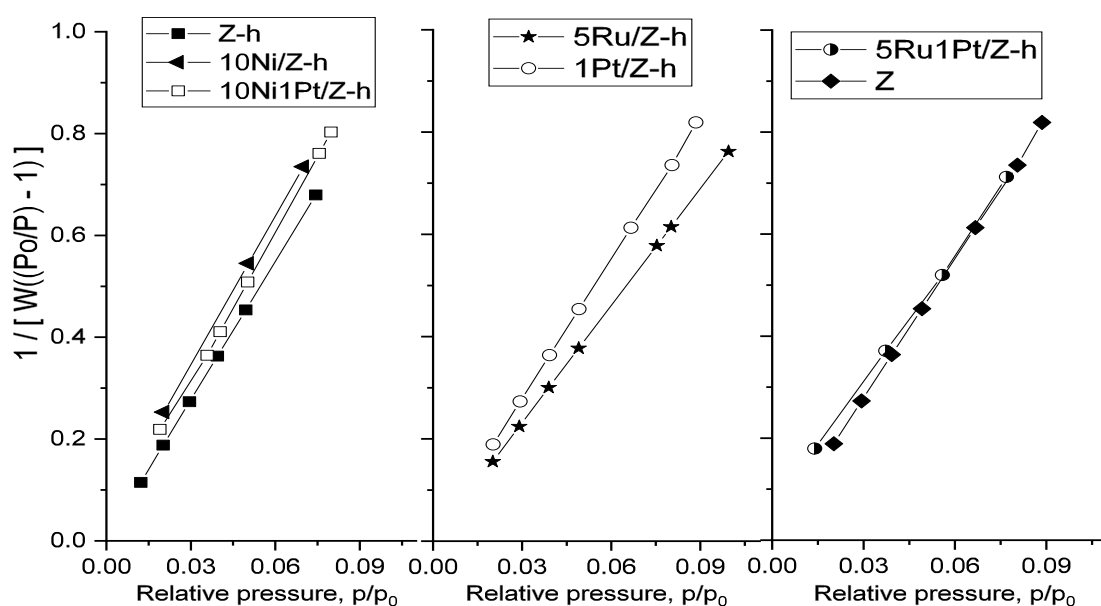

**Figure S1.** Linear fit of  $p/[n(p_0-p)]$  against  $p/p_0$  plots

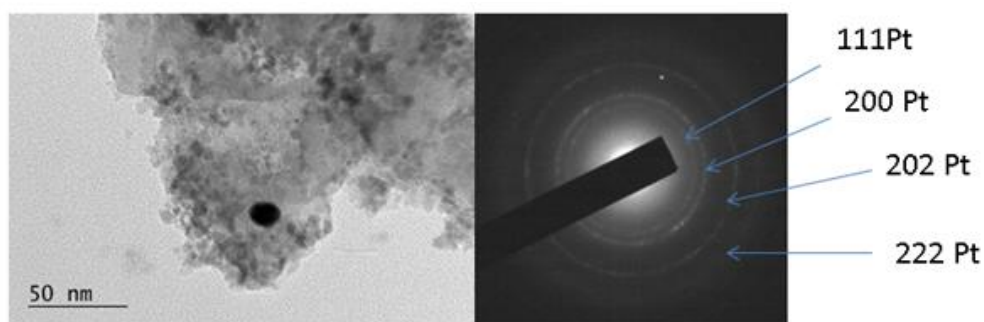

**Figure S2.** SAED of 10Ni1Pt/Z-h (B) (Phases identified: Pt cubic,  $a=3.87800$ , #96-101-1115 and Ni hexagonal,  $a=2.62200$  Å  $c=4.32100$  Å, # 96-901-3008)

**Table S1.** Chemical composition of the studied samples

| Samples     | Content of Ni,<br>wt. % | Content of Pt,<br>wt. % | Content of Ru,<br>wt. % |
|-------------|-------------------------|-------------------------|-------------------------|
| 10Ni/Z-h    | 9.86                    | -                       | -                       |
| 10Ni1Pt/Z-h | 9.92                    | 0.98                    | -                       |
| Pt/Z-h      | 1.02                    | -                       | -                       |
| 5Ru/Z-h     | -                       | -                       | 4.83                    |
| 5Ru1Pt/Z-h  | -                       | 0.92                    | 4.89                    |
